# Supplementary material for: A Constitutional Activating MET Mutation Makes the Genetic Link between Malignancies and Chronic Inflammatory Diseases
Source: Oxford University Press journal article supplement (doi:10.1158/1078-0432.ccr-18-3261), 2019-04-19
Supplement: 10780432ccr183261-sup-209967_2_supp_5397809_pbbw6b.docx [file 10780432ccr183261-sup-209967_2_supp_5397809_pbbw6b.docx]

**Supplementary Table S1 :**

| Concentration of Cas9/sgRNA | Type of SgRNA | Sub-cellular site of injection | Number of mutated blastocysts (%) |
| --- | --- | --- | --- |
| 25ng/10ng | Sg5 | Nucleus | 0/20 (0%) |
| Cytoplasm | 1/16 (6%) |
| Sg8 | Nucleus | 0/16 (0%) |
| Cytoplasm | 0/15 (0%) |
| 50ng/20ng | Sg5 | Nucleus | 3/16 (19%) |
| Cytoplasm | NA |
| Sg8 | Nucleus | 6/24 (25%) |
| Cytoplasm | 4/17 (23.5%)  + 1 indel/17 |

NA : not available
